# Supplementary material
Source: PubMed Central journal article supplement (PMC5382136)
Supplement: NIHMS820341-supplement-Supplemental.pdf [file NIHMS820341-supplement-Supplemental.pdf]

# Supporting Information

## Antifouling Electrospun Nanofiber Mats Functionalized with Polymer Zwitterions

Kristopher W. Kolewe<sup>†1</sup>, Kerianne M. Dobosz<sup>†1</sup>, Katrina A. Rieger<sup>1</sup>, Chia-Chih Chang<sup>2</sup>, Todd  
Emrick<sup>2</sup>, Jessica D. Schiffman<sup>1\*</sup>

<sup>1</sup>Department of Chemical Engineering, University of Massachusetts Amherst, Amherst,  
Massachusetts 01003-9303

<sup>2</sup>Department of Polymer Science and Engineering, University of Massachusetts Amherst,  
Massachusetts 01003-9303

<sup>†</sup> These authors contributed equally.

\* Corresponding author: Jessica D. Schiffman

Email: schiffman@ecs.umass.edu; Phone: (413) 545-6143.

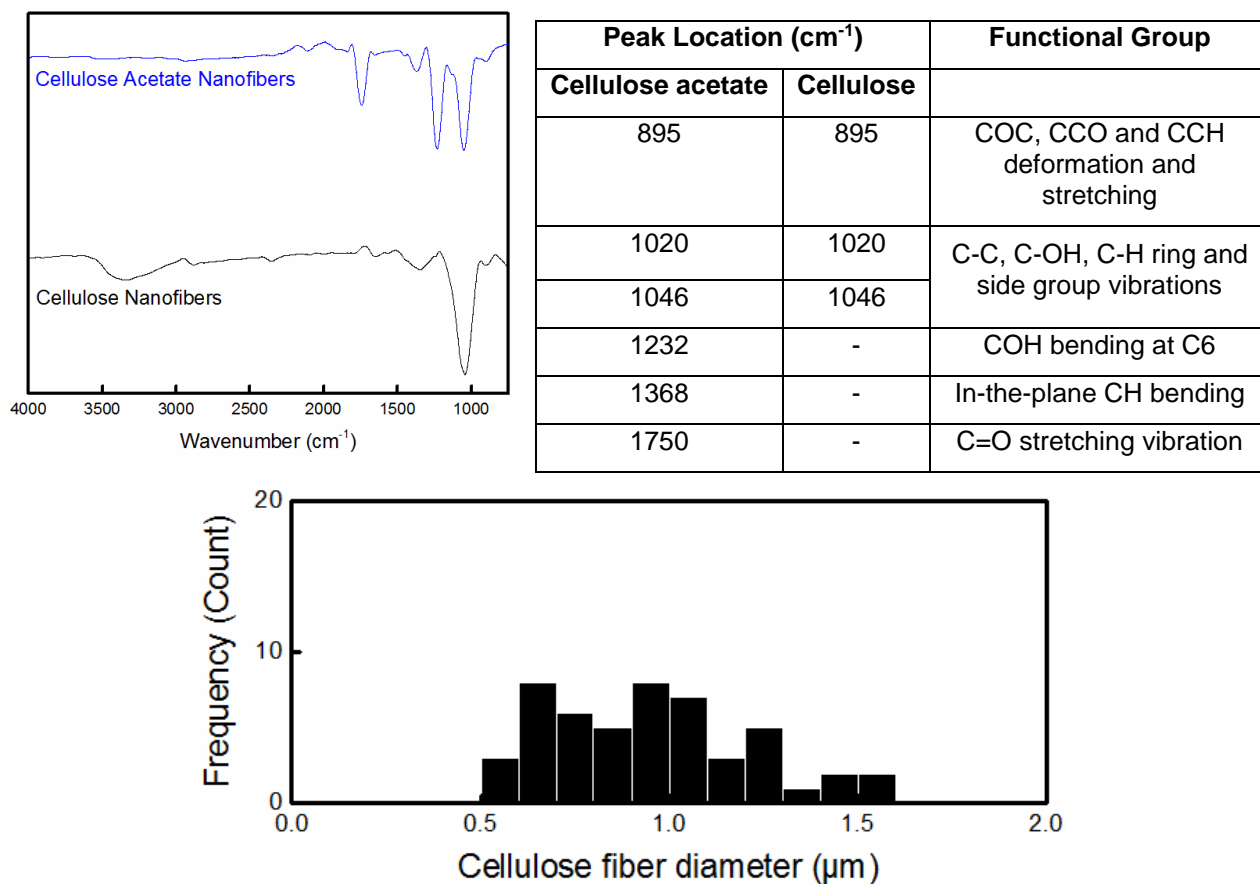

**Figure S1. (Top)** FTIR spectra of the as-spun cellulose acetate and cellulose nanofiber mats are displayed. A table that summarizes the characteristic FTIR peaks of the cellulose acetate and cellulose nanofiber mats are provided. **(Bottom)** A histogram of the fiber diameter distribution of the cellulose nanofiber mats is displayed.

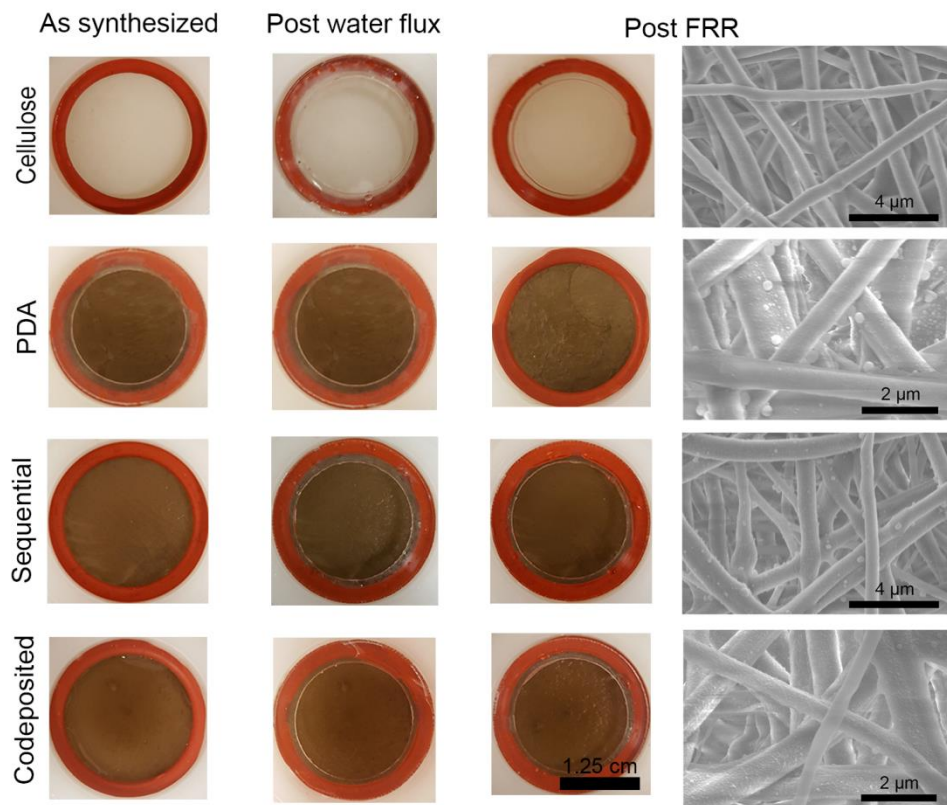

**Figure S2.** Digital images of cellulose, PDA, and polyMPC/PDA (sequential and codeposited) functionalized nanofiber mats are displayed. Images were captured while the sample was loaded into the stirred-cell before testing (as synthesized), post pure water flux experiments, and post FRR experiments. A 1.25 cm scale bar is provided. SEM micrographs of the nanofiber mats post FRR experiments are also provided.

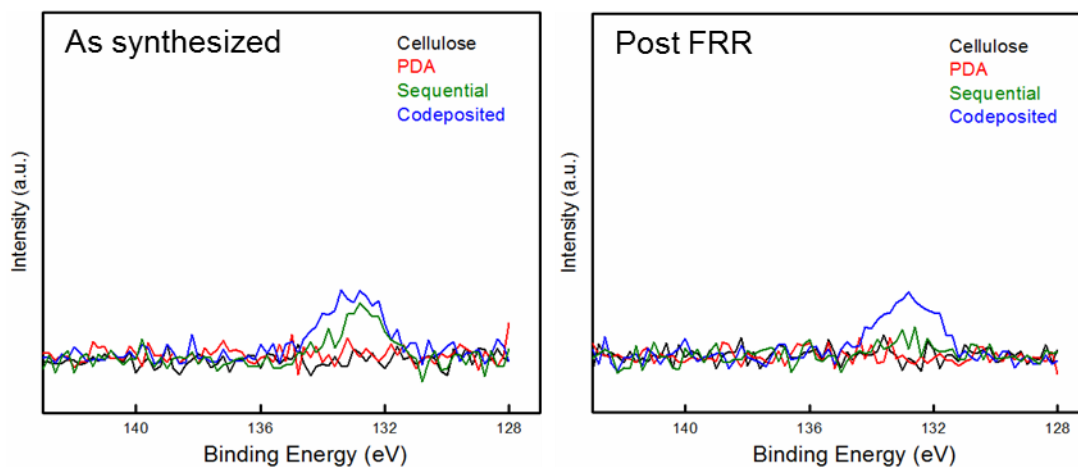

| Sample          | C (%)    | O (%)    | N (%)     | P (%)     | O/C  | N/C  | P/C   | N <sub>401</sub> / N <sub>399</sub> |
|-----------------|----------|----------|-----------|-----------|------|------|-------|-------------------------------------|
| <b>Post FRR</b> |          |          |           |           |      |      |       |                                     |
| Cellulose       | 59 ± 0.6 | 39 ± 0.4 | 1.5 ± 0.9 |           | 0.67 | 0.02 |       |                                     |
| PDA             | 61 ± 0.6 | 34 ± 2.4 | 4.5 ± 1.4 | 0.3 ± 0.3 | 0.56 | 0.07 | 0.005 |                                     |
| Sequential      | 60 ± 1.3 | 38 ± 1.1 | 2.1 ± 0   | 0.2 ± 0.1 | 0.63 | 0.04 | 0.003 | 0.05 ± 0.04                         |
| Codeposited     | 59 ± 2.4 | 38 ± 3.1 | 3.4 ± 0.1 | 0.5 ± 0.5 | 0.64 | 0.06 | 0.008 | 0.15 ± 0.05                         |

**Figure S3. (Top)** Representative XPS spectra of the P<sub>2p</sub> peak of the cellulose, PDA, and polyMPC/PDA (sequential and codeposited) functionalized nanofiber mats as synthesized and post FRR experiments. **(Bottom)** Summary of the elemental analysis of the high resolution XPS that provides composition analysis of the samples post FRR experiments.
